# Supplementary material for: Competency-based training for cancer nurses: a qualitative inquiry
Source: Research Square preprint supplement (doi:10.21203/rs.3.rs-6378843/v1), 2025-05-06
Supplement: Supplementary file 1 [file c996189805ec6cb81d042632.docx]

Appendix 1

The interview questions included:

1. How has the competency-based training influenced your knowledge in cancer care? Can you provide specific examples of how it has affected your understanding or explain why it hasn't?
2. How has the competency-based training influenced your skills in cancer care? Can you describe particular instances where your skills were impacted or discuss why there was no impact?
3. How has the competency-based training influenced your attitude towards cancer care? Could you share specific changes in your attitude or reasons why it remained unchanged?
4. In what ways has the competency-based training fostered consistency in the training and practice of cancer nursing among your colleagues? Can you provide examples of consistent practices or explain why there has been no consistency?
5. How do you perceive the impact of the competency-based training on your ability to provide high-quality care to cancer patients? Could you share specific examples of improved care or reasons why the training has not influenced your ability?
6. What recommendations do you have for improving the implementation of the competency-based training in cancer nurse training?
